# Supplementary material
Source: PubMed Central journal article supplement (PMC1765467)
Supplement: pnas_0609551104_2.pdf [file pnas_0609551104_2.pdf]

Distance to nearest diving vessel ( $\mu\text{m}$ )

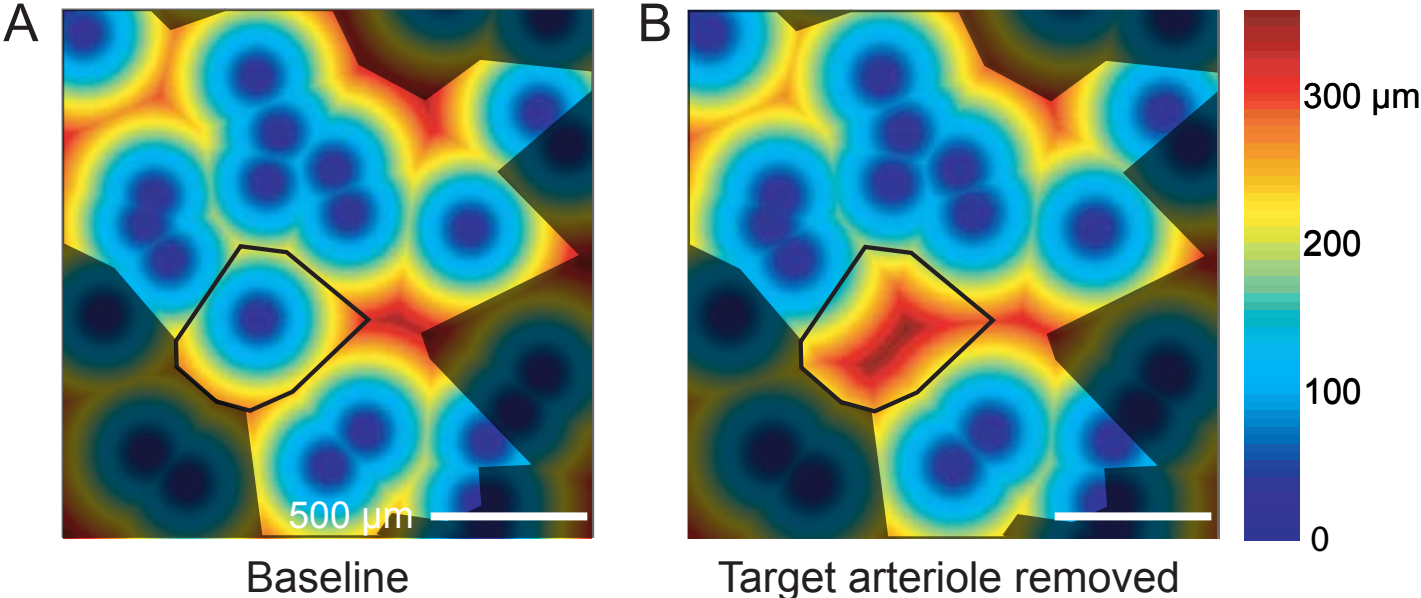

Figure 9 - Supplementary Information - Nishimura, Schaffer, Friedman, Lyden and Kleinfeld
