# Supplementary material
Source: PubMed Central journal article supplement (PMC1765467)

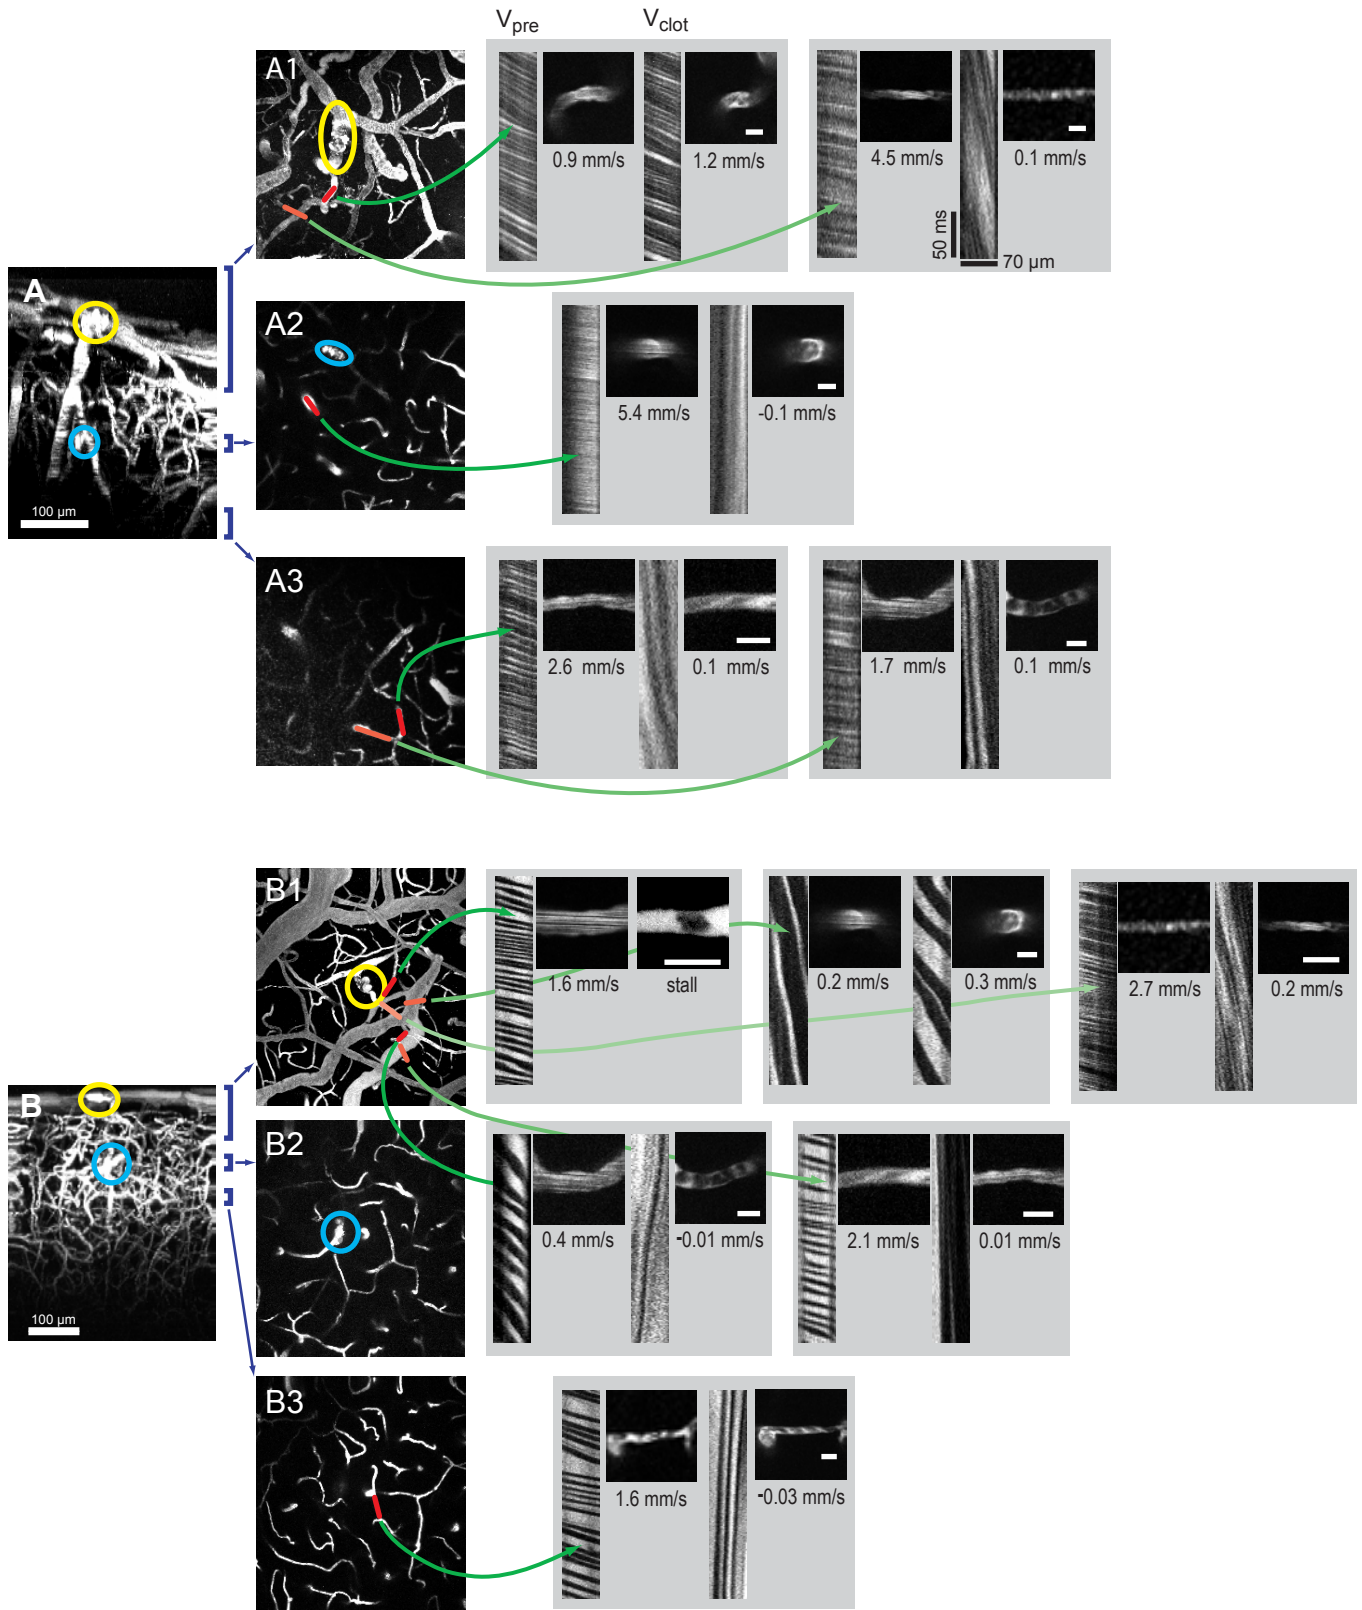

Figure 8 - Supplementary Information - Nishimura, Schaffer, Friedman, Lyden and Kleinfeld

Supplement: pnas_0609551104_1.pdf [file pnas_0609551104_1.pdf]

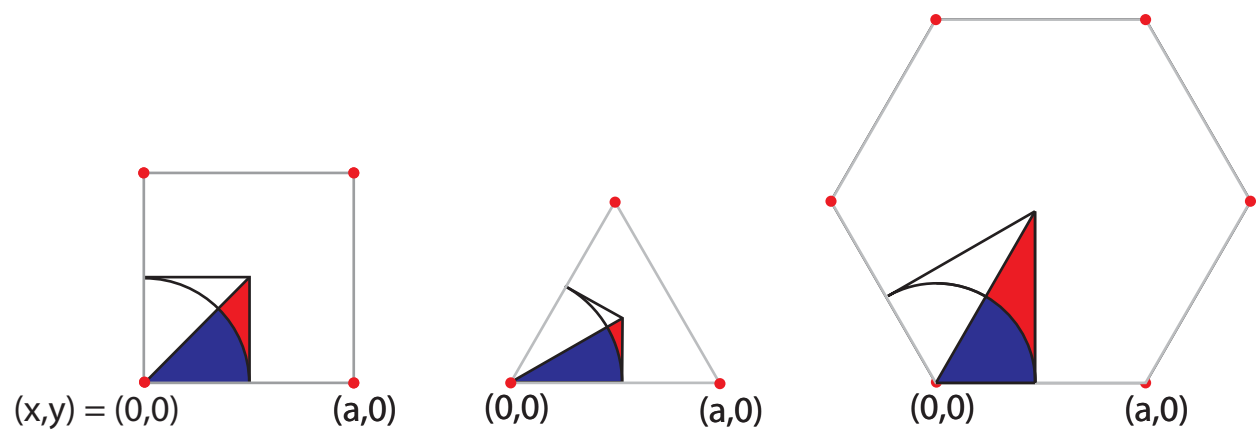

Figure 10 - Supplementary Information - Nishimura, Schaffer, Friedman, Lyden and Kleinfeld

Supplement: pnas_0609551104_3.pdf [file pnas_0609551104_3.pdf]

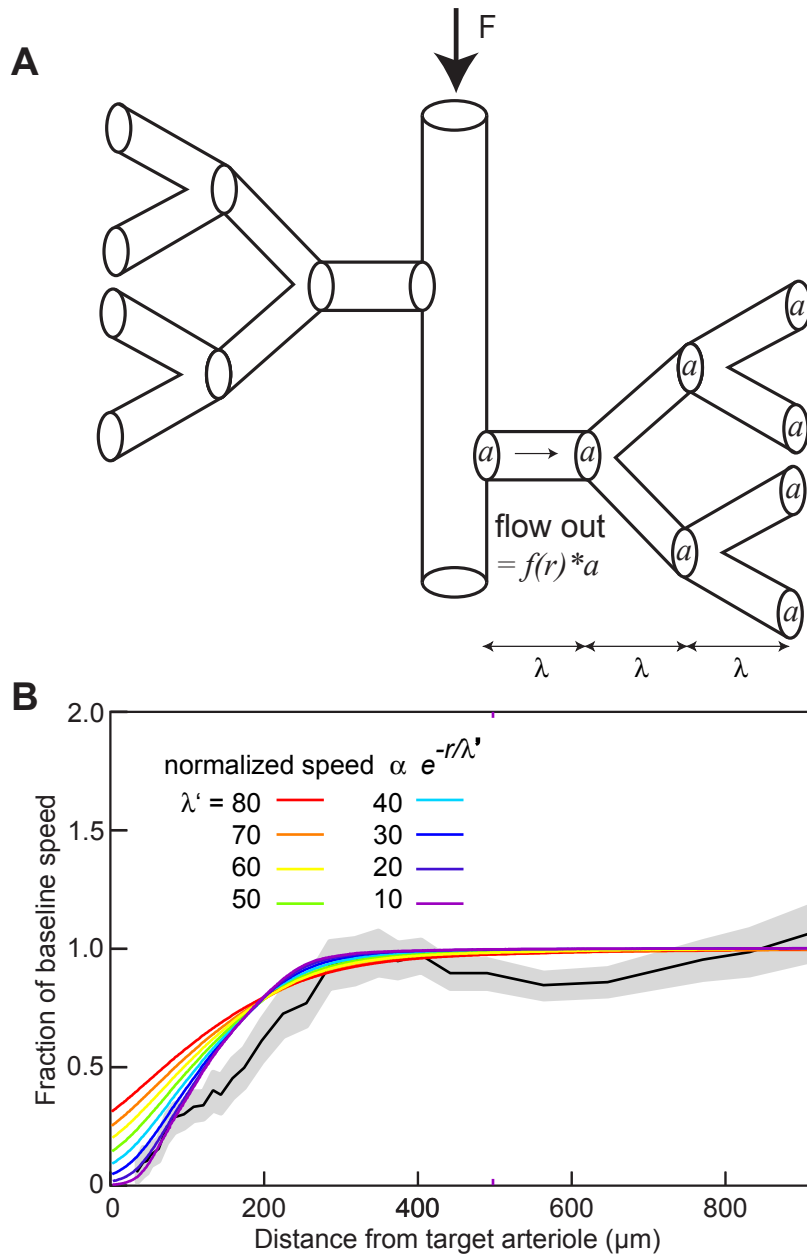

Figure 11 - Supplementary Information - Nishimura, Schaffer, Friedman, Lyden and Kleinfeld

Supplement: pnas_0609551104_4.pdf [file pnas_0609551104_4.pdf]
